1 **Metastatic profiling of HER2-positive breast cancer cell lines in xenograft models**

2

3 Yuxuan Han<sup>1</sup>, Kazushi Azuma<sup>1</sup>, Shinya Watanabe<sup>2</sup>, Kentaro Semba<sup>1,2</sup>, Jun Nakayama<sup>1,3\*</sup>

4

5 <sup>1</sup> Department of Life Science and Medical Bioscience, School of Advanced Science and  
6 Engineering, Waseda University, Tokyo, Japan.

7 <sup>2</sup> Translational Research Center, Fukushima Medical University, Fukushima, Japan.

8 <sup>3</sup> Laboratory of Integrative Oncology, National Cancer Center Research Institute, Tokyo,  
9 Japan.

10 \* Corresponding author

11

12 **Correspondence to:** Jun Nakayama ([junakaya@ncc.go.jp](mailto:junakaya@ncc.go.jp), [jnakayama.re@gmail.com](mailto:jnakayama.re@gmail.com)),  
13 Department of Life Science and Medical Bioscience, School of Advanced Science and  
14 Engineering, Waseda University, TWIns, 2-2 Wakamatsu-cho, Shinjuku-ku, Tokyo, 162-8480,  
15 Japan, Tel/Fax: +81-3-5369-7320.

16

17 **Keywords:** HER2-positive breast cancer; bone metastasis; lung metastasis; in vivo imaging

18

19

20 **Abstract**

21 Most studies on breast cancer metastasis have been performed using triple-negative  
22 breast cancer (TNBC) cells; thus, subtype-dependent metastatic ability of breast cancer is  
23 poorly understood. In this research, we performed intravenous injection (IVI) and  
24 intra-caudal arterial injections (CAI) using nine human epidermal growth factor  
25 receptor-2 (HER2)-positive breast cancer cell lines for evaluating their metastatic  
26 abilities. Our results showed that MDA-MB-453, UACC-893, and HCC-202 had strong  
27 bone metastatic abilities, whereas HCC-2218 and HCC-1419 did not show bone  
28 metastasis. HER2-positive cell lines could hardly metastasize to the lung through IVI.  
29 From the genomic analysis, gene signatures were extracted according to the breast cancer  
30 subtypes and their metastatic preferences. The UACC-893 cell line was identified as a  
31 useful model for the metastasis study of HER2-positive breast cancer. Combined with

32 our previous result on brain proliferation ability, we provide a characteristic metastasis  
33 profile of HER2-positive breast cancer cell lines in this study.

34

35

## 36 **Statements and Declarations**

## 37 **Acknowledgments**

38 We thank Ms Yuka Kuroiwa and laboratory members for the meaningful comments and  
39 discussion.

40

## 41 **Funding**

42 This study was supported by JSPS KAKENHI (grant no. 18K16269: Grant-in-Aid for  
43 Early-Career Scientist to J.N.; grant no. 20J01794, Grant-in-Aid for JSPS fellows to J.N.;  
44 grant no. 20J23297, Grant-in-Aid for JSPS fellows to Y.H.) and partially supported by the  
45 grants for translational research programs from Fukushima Prefecture (S.W. and K.S.).

46

## 47 **Authorship**

48 YH and KA performed the *in vivo* experiments and bioinformatical analyses. SW, and KS  
49 interpreted the data. YH, KA, and JN wrote the manuscript. JN conceived and designed the  
50 study. All the authors reviewed and edited the manuscript.

51

## 52 **Competing Interests**

53 The authors declare that they have no competing interests.

54

## 55 **Ethical approval**

56 The animal experiments were conducted under the approval of the ethics committee of  
57 Waseda University (2020-A067, 2021-A074).

58

59 **Introduction**

60 Breast cancer is the most frequently diagnosed cancer worldwide and appears as the leading  
61 cause of cancer death in females [1]. Cancer cell lines derived from human tumors are widely  
62 used in metastasis study for their potential usefulness in evaluating preclinical trials [2].  
63 Triple-negative subtype MDA-MB-231 cells and luminal-A subtype MCF7 cells have been  
64 most frequently studied in breast cancer metastasis. A recent study that used intracardiac  
65 transplantation released a large-scale metastasis map (MetMap500) of human cancer cell lines  
66 [3]. The work provided a large-scale characterization of human cancer cell lines and the tool  
67 to examine their molecular mechanisms in organ-specific microenvironments. However, their  
68 metastasis map was mainly constructed using the groups of luminal and triple-negative cell  
69 lines in breast cancer. The metastatic potentials of HER2-positive breast cancer cell lines  
70 remain unclear.

71 HER2 is overexpressed in 20% of breast cancers, and HER2-positive breast cancer is  
72 known to be aggressive and have poor outcomes [4]. Although treatments targeting HER2 by  
73 chemotherapy and trastuzumab therapy has been well developed, approximately 25% of  
74 patients still experience a relapse in distant metastatic organs [5, 6]. Thus, the molecular  
75 mechanisms of metastasis in HER2-positive breast cancer must be understood, and the  
76 therapeutic strategies for metastasis should be established. However, only few *in vivo*  
77 metastasis models of HER2-positive breast cancer are available for the study of their  
78 metastatic mechanisms. The *in vivo* transplantation methods affect the evaluation of  
79 metastatic potentials and extracted metastasis gene signatures from human cancer cell lines  
80 [7]. Therefore, not only intracardiac injection, but also various transplantation methods must  
81 be used to evaluate metastatic activities.

82 In our previous research, we transplanted nine HER2-positive breast cancer cell lines in  
83 the brain using intracranial injection and classified them into two groups according to their  
84 proliferation abilities in the brain [8]. In this study, we evaluated the lung and bone metastatic  
85 potentials of the nine HER2-positive breast cancer cell lines by intravenous injection (IVI)  
86 and intracaudal arterial injection (CAI). As a result, the HER2-positive cell lines were  
87 classified according to their metastasis abilities. Furthermore, an expression analysis of the  
88 cell lines identified the cancer subtype and organ-specific gene signatures.

89

90

## 91 **Materials and Methods**

### 92 **Cell culture**

93 MDA-MB-453, UACC-893, HCC-2218, HCC-1419 (ATCC, Manassas, VA, USA), and  
94 ZR-75-1 cells (Institute of Development, Aging and Cancer [IDAC], Miyagi, Japan) were  
95 cultured in Roswell Park Memorial Institute medium (RPMI-1640, Fujifilm Wako Pure  
96 Chemical Corporation, Osaka, Japan) supplemented with 10% fetal bovine serum (FBS;  
97 Nichirei Biosciences Inc., Tokyo, Japan), 100 U/mL penicillin (Meiji-Seika Pharma Co., Ltd.,  
98 Tokyo, Japan), and 100 µg/mL streptomycin (Meiji-Seika Pharma), and incubated under 37°C  
99 with 5% CO<sub>2</sub>. MDA-MB-361 and HCC-202 cells (ATCC) were cultured in RPMI-1640  
100 supplemented with 15% heat-inactivated FBS, 100 U/mL penicillin, and 100 µg/mL  
101 streptomycin at 37°C with 5% CO<sub>2</sub>. BT-474 and UACC-812 (ATCC) were cultured in  
102 Dulbecco's modified Eagle's medium (Fujifilm Wako Pure Chemical Corporation)  
103 supplemented with 10% heat-inactivated FBS, 15% glucose, 100 U/mL penicillin (Meiji  
104 Seika Pharma), and 100 µg/mL streptomycin (Meiji-Seika Pharma) at 37°C with 5% CO<sub>2</sub>.  
105 UACC-812, MDA-MB-361, HCC-202 cells expressing luciferase were established by  
106 infection with lentivirus vector (pLenti-PEF1-*luc2*-IRES-BlaR). UACC-893, MDA-MB-453,  
107 HCC-2218, ZR-75-1, BT-474 and HCC-1419 cells were firstly infected with lentivirus vector  
108 (pLenti-Pubc-*mSlc7a1*-IRES-HygR) in order to express the ecotropic receptor. These 6 cell  
109 lines expressing the ecotropic receptor were infected with retrovirus vector  
110 (pMXd3-PEF1-*luc2*-IRES-BlaR). All cell lines and infection protocols were established in a  
111 previous study [8].

112

### 113 **Animal studies and bioluminescent imaging**

114 Each cell line ( $5.0 \times 10^5$  cells/100 µL phosphate-buffered saline [PBS]) was transplanted into  
115 6-week-old female NOD.CB-17-Prkdc<sup>scid</sup>/J mice (NOD/scid, Charles River Japan, Inc.)  
116 via CAI or IVI [9–11]. The mice were anesthetized with 2.5% isoflurane (Fujifilm Wako)  
117 during transplantation and bioluminescence imaging (BLI). Bone and lung metastases were  
118 monitored using BLI with an IVIS Lumina XRMS In Vivo Imaging System (PerkinElmer)  
119 once a week. Each mouse was intraperitoneally injected with 3-mg D-luciferin (Gold

120 Biotechnology Inc.) in 200- $\mu$ L PBS before observation. Bioluminescent signal was measured  
121 with binning and F/stop ranges suited to each bioluminescence level. The lungs were  
122 harvested from the mice at 8 weeks after transplantation. The *ex vivo* observation of the lung  
123 was performed using IVIS-XRMS with the D-luciferin solution.

124

### 125 **Microarray Analysis**

126 DNA microarray data provided in the previous research were used for genetic analysis [12].  
127 The heatmap was drawn using the “pheatmap” package of R version 3.6.1. The Gene  
128 Ontology (GO) term enrichment analysis was performed using Metascape [13]. A principal  
129 component analysis (PCA) was performed in R with the “scatterplot3d” package. A Venn  
130 diagram was drawn using the “ggplot2” package.

131

### 132 **Survival analysis**

133 Survival analysis was performed using the Kaplan-Meier method for patients with breast  
134 cancer in the Molecular Taxonomy of Breast Cancer International Consortium (METABRIC)  
135 data set, as described previously [8, 14, 15].

136

### 137 **Data availability**

138 The microarray data of the nine HER2-positive cell lines were obtained from a previous study  
139 [12].

140

141

## 142 **Results**

### 143 **Bone metastasis profiles of the HER2-positive breast cancer cell lines**

144 Nine HER2-positive breast cancer cell lines expressing the *luc2* gene, namely UACC-893,  
145 MDA-MB-453, HCC-2218, BT-474, ZR-75-1, UACC-812, MDA-MB-361, HCC-202, and  
146 HCC-1419, were transplanted into NOD-SCID mice using the CAI method. After the CAI,  
147 MDA-MB-453, UACC-893, and HCC-202 proliferated rapidly at week 8 (Fig. 1a).  
148 HCC-2218 and HCC-1419 showed no tumor formation at week 8, which suggests that both  
149 have no bone metastatic potential. On the other hand, BT474, ZR-75-1, UACC812, and

150 MDA-MB-361 migrated and survived in bone microenvironment. Their proliferation abilities  
151 were much milder than those of MDA-MB-453, UACC-893, and HCC-202 (Fig. 1b). We  
152 further classified the cell lines according to their number of metastasis tumors and  
153 proliferation ability into high, medium, low, and not applicable (N/A) groups (Table 1). We  
154 noticed that the tumor sizes of HCC-202 and MDA-MB-361 decreased after week 6. This  
155 result suggested that HCC-202 and MDA-MB-361 cells might not be able to survive in  
156 long-term metastasis.

157 We divided the nine HER2-positive cell lines into two groups. The high metastatic  
158 potential group included MDA-MB-453, UACC-893 and HCC-202, and the low/no  
159 metastatic potential group included the BT-474, ZR-75-1, UACC-812, MDA-MB-361,  
160 HCC-2218, and HCC-1419 cell lines. The gene expression level was standardized into a  
161 z-score. The genes with average z-scores  $> 1.0$  and  $< -1.0$  were counted as upregulated and  
162 downregulated genes, respectively (Fig. 2a). We calculated the average log fold-change (FC)  
163 ratio change between the high and low potential groups. The genes with an average logFC  
164 of  $>1.0$  or  $<-1.0$  were counted as differential expression genes (DEGs). Seventy-three  
165 upregulated genes and 69 downregulated genes were extracted as gene signatures in  
166 HER2-positive breast cancer (Fig. 2b, Table 2). The gene signatures clustered nine breast  
167 cancer cell lines into high, medium/low, and N/A metastatic potentials, consistent with our  
168 previous data (Table 1). Genes that were reported as metastasis signatures such as  
169 tumor-associated calcium signal transducer 2 (*TACSTD2*) and galectin-1 (*LGALS1*) were  
170 extracted [16, 17]. Moreover, the metabolisms of amino acids and their derivatives were  
171 mostly enriched in the high metastatic group, and the transcriptional regulation of runt-related  
172 transcription factor 3 (*RUNX3*) was overall enriched in the high potential group (Fig. 2c).  
173 Other than *RUNX3*, nuclear factor-kappa B (*NF- $\kappa$ B*) and metastasis-related runt-related  
174 transcription factor 1 (*RUNX1*) signals were also enriched in the high potential groups [18,  
175 19].

176

### 177 **Survival analysis of bone gene signatures**

178 To further evaluate the relevance between the extracted gene signatures and the clinical  
179 prognosis of patients with HER2-positive breast cancer, we performed a survival analysis

180 using the METABRIC data set (Fig. 3a, b). The upregulated gene signatures included  
181 insulin-induced gene 2 (*INSIG2*), NAD(P)H dehydrogenase, quinone 1 (*NQO1*), and the  
182 downregulated gene 4-aminobutyrate aminotransferase (*ABAT*), which correlated with the  
183 poor prognosis in HER2-positive breast cancer and all breast cancer subtypes (Supplementary  
184 Fig. S1). On the other hand, myotubularin-related protein 2 (*MTMR2*) had  
185 HER2-positive-specific clinical signatures that showed no relationship with patient prognosis  
186 in all breast cancers. This result also suggests that the clinical markers varied between  
187 HER2-positive breast cancer and other breast cancer subtypes.

188

### 189 **Lung metastasis profiles of the HER2-positive breast cancer cell lines**

190 Nine cancer cell lines were transplanted into mice via IVI. Slight but substantial luminescence  
191 was detected for two cell lines, UACC-893 and HCC-202, which suggests that they have low  
192 lung metastasis or viability in the lung (Fig. 4a). However, no luminescence was detected in  
193 the other seven cell lines, namely MDA-MB-453, ZR-75-1, HCC-1419, HCC-2218, BT-474,  
194 and MDA-MB-361, until week 8 (Fig. 4b). *Ex vivo* BLI was then performed by removing the  
195 lungs from each mouse to examine the lung metastatic ability more accurately. In the mice  
196 transplanted with UACC-893 and HCC-202, luminescence was detected from the lungs (Fig.  
197 4c). Even *ex vivo* imaging, however, did not detect luminescence from the lungs for the other  
198 seven cell lines, namely MDA-MB-453, ZR-75-1, HCC-1419, HCC-2218, BT-474, and  
199 MDA-MB-361. On the basis of these results, we classified the UACC-893 and HCC-202 cell  
200 lines into a group with low lung metastatic potential, and the remaining seven cell lines into a  
201 group without metastasis potential (Table 1).

202 From the IVI result, we reanalyzed the microarray data using the same strategy as in the  
203 reanalysis of data from the group with bone metastasis. The average *z*-score of each gene was  
204 calculated for two groups and visualized as a Venn diagram (Fig. 5a). Then, the genes highly  
205 or lowly expressed in the low metastasis group only were subjected to GO enrichment  
206 analysis. The genes related to lipid metabolism were enriched in the low metastasis group.  
207 Next, the genes with an average logFC > 1.0 or -1.0 were extracted as DEGs. In the  
208 UACC-893 and HCC-202 cell lines, 162 genes were upregulated, and 95 genes were  
209 downregulated as compared with the other seven cell lines (Fig 5b, Table 3). Among the

210 genes that were highly expressed in UACC-893 and HCC-202 as compared with the no  
211 metastasis group are genes such as transmembrane 4 superfamily member 1 (*TM4SF1*) and  
212 *LGALS1*. *TM4SF1* was previously reported to promote metastatic activation in multiple  
213 organs, including the lung, across breast cancer subtypes [20]. *LGALS1* was previously  
214 reported to promote lung metastasis of claudin-low breast cancers [17].

215

### 216 **Characterization of HER2-positive cell lines by cancer subtype-specific analysis**

217 To further characterize these HER2-positive cell lines, we clustered the nine HER2-positive  
218 cell lines according to their whole-gene expression levels. The nine cell lines were divided  
219 into three groups (Fig. 6a). The clustering tree of the HER2-positive cell lines exhibited that  
220 the low-lung and high-bone metastasis cell lines UACC-893 and HCC-202 were relevant to  
221 each other, while the other HER2-positive cell lines were clustered independently according  
222 to their metastatic ability. Next, we quantified their metastasis potential according to their  
223 metastatic abilities to each organ site, including the brain metastatic activities and their *in*  
224 *vitro* proliferation ability [8], which has been previously obtained (Table S1). Three  
225 dimensional PCA (3D PCA) suggested that the UACC-893 cells had a significant difference  
226 in metastatic ability from the rest of the eight cell lines (Fig. 6b).

227 We previously established the high-metastatic cell lines of luminal breast cancer and  
228 triple-negative breast cancer (TNBC) by using the CAI method, and the bone metastasis gene  
229 signatures from luminal breast cancer and TNBC proved to be distinct from each other [10].  
230 This suggests that the metastatic mechanism may vary among the molecular subtypes of  
231 breast cancer. Therefore, to provide a subtype-specific gene profile of breast cancer, we  
232 performed a comparative analysis of the gene signatures between HER2-positive breast  
233 cancers, luminal breast cancer, and TNBC (Fig. 7). The result showed no common  
234 upregulated or downregulated gene signature among the three subtypes. Six common  
235 upregulated signatures were found between luminal and TNBC, and three common  
236 upregulated signatures were found between luminal and HER2-positive breast cancers. On the  
237 other hand, only one common downregulated gene was found between TNBC and  
238 HER2-positive. The common downregulated signature genes both belonged to a family with  
239 disintegrin and metalloproteinase with thrombospondin motifs (ADAMTS).



240

### 241 **Characterization of HER2-positive cell lines by organ-specific analysis**

242 The HER2-positive cell lines exhibited various metastasis characteristics. We compared the  
243 extracted gene signatures from bone metastasis, lung metastasis, and brain colonization to  
244 demonstrate the organ-specific metastasis features. The results indicated no common  
245 upregulated signature among the three organ sites (Fig. 8). However, four common gene  
246 signatures, namely 4-aminobutyrate aminotransferase (*ABAT*), MYB proto-oncogene like 1  
247 (*MYBL1*), Twist-related protein 1 (*TWIST1*), and olfactomedin 1 (*OLFM1*), were  
248 downregulated in the bone, lung, and brain. *ABAT* correlated with the clinical patient  
249 prognosis in both HER2-positive breast cancer and all breast cancer subtypes (Fig. 3b,  
250 Supplementary Fig S1b). The metastasis signatures of the HER2-positive cells were more  
251 commonly shared between bone and lung metastases, rather than brain metastasis. The result  
252 of the comparative analysis suggests that brain colonization of HER2-positive breast cancer  
253 had a unique mechanism compared with those in bone and lung metastases.

254

255

### 256 **Discussion**

257 In this study, we established the xenograft models of lung and bone metastases by using nine  
258 HER2-positive breast cancer cell lines. Our results profiled their metastatic potentials in  
259 xenograft models and provided novel models for future studies on HER2-positive breast  
260 cancer metastasis mechanisms.

261 IVIs of UACC-893 and HCC-202 were confirmed to generate weak but significant  
262 luminescence in the lung. Thus, they can proliferate very slowly or continue to survive  
263 without proliferation. The enrichment analysis revealed that genes involved in lipid  
264 metabolism were enriched in the low metastasis group. Regulation of lipid metabolism  
265 contributes to increased aggression of breast cancer [21] and regulation of CSC [22]. In this  
266 regard, *PFKFB3* is commonly upregulated as a lipid metabolism-related gene known to be  
267 associated with cancer [23]. In addition to *PFKFB3*, *NDRG1* [21], *KDM5B* [24], and  
268 *JAK/STAT3* [22] have been reported as lipid metabolism-related genes associated with breast  
269 cancer. They may contribute to breast cancer malignancy through cell proliferation, migration,

270 drug resistance, and cancer stem cells. These two cell lines may be useful for elucidating the  
271 new dormancy or survival mechanism in the lungs through the lipid metabolism. The other  
272 seven cell lines have no lung metastatic ability. Previous studies reported that IVI has low or  
273 no ability to metastasize to the lung in MDA-MB-453 and BT-474 [25]. In addition, by using  
274 intracardiac injection method, ZR-75-1 and HCC-1419 have also been reported to have no  
275 lung metastatic potential [3]. Other reports indicated that MDA-MB-453 and BT-474 cell  
276 lines were able to metastasize to the lung. However, a direct comparison is difficult because  
277 the mouse species used for transplantation were different or the number of transplanted cells  
278 was extremely large compared with that in this study [26, 27]. Moreover, although IVI was  
279 used in this experiment for the purpose of mimicking lung metastasis, previous studies  
280 confirmed that the population of enriched cells differs depending on the transplantation  
281 method [11]. In fact, one study reported that lung metastasis of the MDA-MB-453 cell line  
282 was confirmed by orthotopic transplantation in NSG mice [28]. In this study, we focused on  
283 the extravasation abilities and the following colonization and proliferation in the lung,  
284 examined using IVI. Thus, different results may be obtained if a pre-metastatic niche induced  
285 by orthotopic transplantation plays a significant role in lung metastasis.

286 From the results of our bone metastasis experiment, three of the nine HER2-positive cell  
287 lines, HCC-202, MDA-MB-453, and UACC-893, could rapidly grow in bone  
288 microenvironment, whereas the others could hardly form bone metastatic tumor. Even though  
289 the metastasis possibility to form a tumor in bone was different among the three cell lines,  
290 their high proliferative ability in bone microenvironment during long-term observation  
291 demonstrated that they have high bone metastatic ability. Compared with their lung metastatic  
292 ability, some of the HER2-positive cell lines exhibited stronger bone metastasis potential and  
293 brain colonization ability. Among the nine HER2-positive cell lines, UACC-893 had both  
294 lung and bone metastatic potentials and proliferation ability in the brain. This suggests that  
295 UACC-893 was a more aggressive cell line than the others and is a suitable model for  
296 multiorgan breast cancer metastasis research. As almost no study has focused on UACC-893,  
297 our result could contribute to breast cancer metastasis studies.

298 On the basis of the transcriptome analyses of HER2-positive cell lines, the transcriptional  
299 signals of *RUNX3* were enriched in the high bone metastasis group. *RUNX3* was a

300 downstream effector of the transforming growth factor- $\beta$  (TGF- $\beta$ ) signal pathway and  
301 regulates various cancer-related activities such as epithelial-to-mesenchymal transition (EMT)  
302 and cancer cell migration and invasion [29]. TGF- $\beta$  is crucial in the vicious cycle within bone  
303 microenvironment and promotes the osteolytic bone metastasis of breast cancer [30, 31].  
304 Therefore, our finding suggests that *RUNX3* signals may contribute to the vicious cycle  
305 between HER2-positive cancer cells and bone microenvironment. On the other hand, the  
306 genes that regulated the proteoglycans (PGs) of cancer, including protein kinase B (AKT1)  
307 and cell-surface glycoprotein (CD44), were downregulated in the high metastasis potential  
308 group. The PGs promote the cell-cell junction and migration ability [32] but can also suppress  
309 tumor activities [33]. They may function as tumor metastasis suppressors in HER2-positive  
310 cancer bone metastasis.

311       According to the subtype-specific comparison, the breast cancer subtypes (luminal,  
312 HER2, and TNBC) did not share common gene signatures. This suggests that the breast  
313 cancer subtypes have unique metastatic mechanisms. The brain colonization abilities of the  
314 HER2-positive breast cancer cell lines showed no correlation with HER2 phosphorylation or  
315 expression levels [8]. Novel factors in HER2-positive cells could possibly regulate their  
316 metastasis preference. From the organ-specific comparison analysis, four common  
317 downregulated gene signatures were extracted, including *ABAT*, whose low expression  
318 correlated with poor prognosis. *ABAT* is an inhibitory neurotransmitter in the central nervous  
319 system. Its high expression level suppressed the lung metastasis ability of MDA-MB-231 [34],  
320 and its downregulation is a hallmark of ER+ breast cancer [35]. Downregulation of *ABAT*  
321 may also contribute to the multiorgan metastasis of HER2-positive tumor cells.

322       In conclusion, we classified the nine HER2-positive breast cancer cell lines into  
323 metastatic subgroups according to their CAI, IVI, and transcriptomic profiles. The extracted  
324 metastasis gene signatures were potential prognostic marker genes of HER2-positive breast  
325 cancer. Our results suggest that the UACC-893 cell line is a useful model for breast cancer  
326 metastasis studies. These models and gene signatures will contribute to the further  
327 understanding of the mechanisms of metastasis in HER2-positive breast cancer.

328

329 **Reference**

- 330 1. Jemal A, Bray F, M M, et al (2011) Global cancer statistics. *Ca Cancer J Clin*  
331 61:69–90. <https://doi.org/10.3322/caac.20107>.
- 332 2. Liu K, Newbury PA, Glicksberg BS, et al (2019) Evaluating cell lines as models for  
333 metastatic breast cancer through integrative analysis of genomic data. *Nat Commun*  
334 10:. <https://doi.org/10.1038/s41467-019-10148-6>
- 335 3. Jin X, Demere Z, Nair K, et al (2020) A metastasis map of human cancer cell lines.  
336 *Nature* 588:331–336. <https://doi.org/10.1038/s41586-020-2969-2>
- 337 4. Gong Y, Liu YR, Ji P, et al (2017) Impact of molecular subtypes on metastatic breast  
338 cancer patients: A SEER population-based study. *Sci Rep* 7:.  
339 <https://doi.org/10.1038/srep45411>
- 340 5. Jiang H, Rugo HS (2015) Human epidermal growth factor receptor 2 positive (HER2+)  
341 metastatic breast cancer: How the latest results are improving therapeutic options.  
342 *Ther Adv Med Oncol* 7:321–339. <https://doi.org/10.1177/1758834015599389>
- 343 6. Asif HM, Sultana S, Ahmed S, et al (2016) HER-2 positive breast cancer - A  
344 mini-review. *Asian Pacific J Cancer Prev* 17:1609–1615.  
345 <https://doi.org/10.7314/APJCP.2016.17.4.1609>
- 346 7. Nakayama J, Han Y, Kuroiwa Y, et al (2021) The in vivo selection method in breast  
347 cancer metastasis. *Int J Mol Sci* 22:1–19. <https://doi.org/10.3390/ijms22041886>
- 348 8. Kuroiwa Y, Nakayama J, Adachi C, et al (2020) Proliferative Classification of  
349 Intracranially Injected HER2-positive Breast Cancer Cell Lines. *Cancers (Basel)* 12:.  
350 <https://doi.org/10.3390/cancers12071811>
- 351 9. Kuchimaru T, Kataoka N, Nakagawa K, et al (2018) A reliable murine model of bone  
352 metastasis by injecting cancer cells through caudal arteries. *Nat Commun* 9:2981.  
353 <https://doi.org/10.1038/s41467-018-05366-3>
- 354 10. Han Y, Nakayama J, Hayashi Y, et al (2020) Establishment and characterization of  
355 highly osteolytic luminal breast cancer cell lines by intracaudal arterial injection.  
356 *Genes to Cells* 25:111–123. <https://doi.org/10.1111/gtc.12743>
- 357 11. Nakayama J, Ito E, Fujimoto J, et al (2017) Comparative analysis of gene regulatory  
358 networks of highly metastatic breast cancer cells established by orthotopic

- 359 transplantation and intra-circulation injection. *Int J Oncol* 50:497–504.  
360 <https://doi.org/10.3892/ijo.2016.3809>
- 361 12. Ito E, Honma R, Yanagisawa Y, et al (2007) Novel clusters of highly expressed genes  
362 accompany genomic amplification in breast cancers. *FEBS Lett* 581:3909–3914.  
363 <https://doi.org/10.1016/j.febslet.2007.07.016>
- 364 13. Zhou Y, Zhou B, Pache L, et al (2019) Metascape provides a biologist-oriented  
365 resource for the analysis of systems-level datasets. *Nat Commun* 10:.  
366 <https://doi.org/10.1038/s41467-019-09234-6>
- 367 14. Murakami A, Maekawa M, Kawai K, et al (2019) Cullin-3 / KCTD10 E3 complex is  
368 essential for Rac1 activation through RhoB degradation in human epidermal growth  
369 factor receptor 2- - positive breast cancer cells. *Cancer Sci* 110:650–661.  
370 <https://doi.org/10.1111/cas.13899>
- 371 15. Nishiyama K, Maekawa M, Nakagita T, et al(2021) CNKSR1 serves as a scaffold to  
372 activate an EGFR phosphatase via exclusive interaction with RhoB-GTP. *Life Science*  
373 *Alliance*. 4:e202101095. doi: 10.26508/lsa.202101095.
- 374 16. Goldenberg DM, Stein R, Sharkey RM (2018) The emergence of trophoblast  
375 cell-surface antigen 2 (TROP-2) as a novel cancer target. *Oncotarget* 9:28989–29006.  
376 <https://doi.org/10.18632/oncotarget.25615>
- 377 17. Dalotto-Moreno T, Croci DO, Cerliani JP, et al (2013) Targeting galectin-1 overcomes  
378 breast cancer-associated immunosuppression and prevents metastatic disease. *Cancer*  
379 *Res* 73:1107–1117. <https://doi.org/10.1158/0008-5472.CAN-12-2418>
- 380 18. Escárcega RO, Fuentes-Alexandro S, García-Carrasco M, et al (2007) The  
381 Transcription Factor Nuclear Factor-kappa B and Cancer. *Clin Oncol* 19:154–161.  
382 <https://doi.org/10.1016/j.clon.2006.11.013>
- 383 19. Li Q, Lai Q, He C, et al (2019) RUNX1 promotes tumour metastasis by activating the  
384 Wnt/ $\beta$ -catenin signalling pathway and EMT in colorectal cancer. *J Exp Clin Cancer*  
385 *Res* 38:. <https://doi.org/10.1186/s13046-019-1330-9>
- 386 20. Hua G, Goutam, Chakraborty Zhanguo Z, Intissar A, et al (2016) Multi-organ Site  
387 Metastatic Reactivation Mediated by Non- canonical Discoidin Domain Receptor 1  
388 Signaling. *Cell* 166:47–62. <https://doi.org/10.1016/j.cell.2016.06.009>.Multi-organ

- 389 21. Sevinsky CJ, Khan F, Kokabee L, et al (2018) NDRG1 regulates neutral lipid  
390 metabolism in breast cancer cells. *Breast Cancer Res* 20:  
391 <https://doi.org/10.1186/s13058-018-0980-4>
- 392 22. Tianyi W, Johannes Francois F, Heehyoung L, et al (2018) JAK/STAT3-Regulated  
393 Fatty Acid  $\beta$ -Oxidation Is Critical for Breast Cancer Stem Cell Self-Renewal and  
394 Chemoresistance. *cell Metab* 27:136–150.  
395 <https://doi.org/10.1016/j.cmet.2017.11.001>.JAK/STAT3-Regulated
- 396 23. Shi L, Pan H, Liu Z, et al (2017) Roles of PFKFB3 in cancer. *Signal Transduct Target*  
397 *Ther* 2:. <https://doi.org/10.1038/sigtrans.2017.44>
- 398 24. Zhang ZG, Zhang HS, Sun HL, et al (2019) KDM5B promotes breast cancer cell  
399 proliferation and migration via AMPK-mediated lipid metabolism reprogramming.  
400 *Exp Cell Res* 379:182–190. <https://doi.org/10.1016/j.yexcr.2019.04.006>
- 401 25. Clinchy B, Gazdar A, Rabinovsky R, et al (2000) The growth and metastasis of human,  
402 HER-2/neu-overexpressing tumor cell lines in male SCID mice. *Breast Cancer Res*  
403 *Treat* 61:217–228. <https://doi.org/10.1023/A:1006494001861>
- 404 26. Nanni P, Nicoletti G, Palladini A, et al (2012) Multiorgan metastasis of human  
405 HER-2+ breast cancer in Rag2<sup>-/-</sup>;Il2rg<sup>-/-</sup> mice and treatment with PI3K inhibitor.  
406 *PLoS One* 7:e39626. <https://doi.org/10.1371/journal.pone.0039626>
- 407 27. Hung SW, Chiu CF, Chen TA, et al (2012) Recombinant viral protein VP1 suppresses  
408 HER-2 expression and migration/metastasis of breast cancer. *Breast Cancer Res Treat*  
409 136:89–105. <https://doi.org/10.1007/s10549-012-2238-7>
- 410 28. Cleris, Daidone, Fina, Cappelletti (2019) The Detection and Morphological Analysis  
411 of Circulating Tumor and Host Cells in Breast Cancer Xenograft Models. *Cells* 8:683.  
412 <https://doi.org/10.3390/cells8070683>
- 413 29. Chen F, Liu X, Bai J, et al (2016) The emerging role of RUNX3 in cancer metastasis  
414 (Review). *Oncol Rep* 35:1227–1236. <https://doi.org/10.3892/or.2015.4515>
- 415 30. Hiraga T (2019) Bone metastasis: Interaction between cancer cells and bone  
416 microenvironment. *J Oral Biosci* 61:95–98. <https://doi.org/10.1016/j.job.2019.02.002>
- 417 31. Yin JJ, Selander K, Chirgwin JM, et al (1999) TGF- $\beta$  signaling blockade inhibits  
418 PTHrP secretion by breast cancer cells and bone metastases development. *J Clin*

- 419 Invest 103:197–206. <https://doi.org/10.1172/JCI3523>
- 420 32. Barkovskaya A, Buffone A, Žídek M, Weaver VM (2020) Proteoglycans as Mediators  
421 of Cancer Tissue Mechanics. *Front Cell Dev Biol* 8:  
422 <https://doi.org/10.3389/fcell.2020.569377>
- 423 33. Fjeldstad K, Kolset SO (2005) Decreasing the metastatic potential in  
424 cancers--targeting the heparan sulfate proteoglycans. *Curr Drug Targets* 6:665–682.  
425 <https://doi.org/10.2174/1389450054863662>
- 426 34. Chen X, Cao Q, Liao R, et al (2019) Loss of ABAT-mediated GABAergic system  
427 promotes basal-like breast cancer progression by activating Ca<sup>2+</sup>-NFAT1 axis.  
428 *Theranostics* 9:34–47. <https://doi.org/10.7150/thno.29407>
- 429 35. Jansen MPH, Sas L, Sieuwerts AM, et al (2015) Decreased expression of ABAT and  
430 STC2 hallmarks ER-positive inflammatory breast cancer and endocrine therapy  
431 resistance in advanced disease. *Mol Oncol* 9:1218–1233.  
432 <https://doi.org/10.1016/j.molonc.2015.02.006>
- 433
- 434

435 **Figure Legends**

436 **Fig. 1 Intra-caudal arterial injection (CAI) transplantation of HER2-positive cell lines**

437 MDA-MB-453, UACC-893, HCC-202, BT-474, ZR-75-1, UACC-812, MDA-MB-361,  
438 HCC-2218, and HCC-1419 cells were injected in NOD/SCID mouse (n = 4) by using the CAI  
439 method. The tumor growth was quantified by measuring bioluminescence every week and  
440 plotted into a growth curve. Each line showed the corresponding bone metastasis tumor. Left:  
441 Bioluminescence on week 1. Right: Bioluminescence on week 8. (a) High bone metastasis  
442 potential group. (b) Medium and low bone metastasis potential group.

443

444 **Fig. 2 Extraction of bone metastasis gene signatures of the HER2-positive cell lines**

445 (a) Genes were extracted and further analyzed:  $\log_{2}FC < -1$  or  $\log_{2}FC > 1.0$ ,  $p < 0.05$  and FDR  
446  $< 0.05$ . The number of upregulated and downregulated genes in the high and low potential  
447 groups are summarized in the Venn diagrams. (b) The differential expression gene (DEGs)  
448 extracted from the high and low potential groups were analyzed by hierarchical clustering and  
449 are shown in a heatmap. (c) The Gene Ontology enrichment analysis of upregulated and  
450 downregulated DEGs.

451

452 **Fig. 3 Clinical prognosis of bone metastasis gene signatures**

453 (a) Survival analysis of differential expression gene (DEGs) in the high potential group using  
454 the METABRIC data set. The colored region along the curve shows the 95% confidence  
455 intervals. The table at the bottom lists the number of patients with high or low gene  
456 expression in the HER2-positive subtype. The results of the survival analysis of the  
457 upregulated DEGs in the HER2-positive patients are also shown. (b) Survival analysis results  
458 of the downregulated DEGs in the HER2-positive patients.

459

460 **Fig. 4. Intravenous injection (IVI) transplantation of the HER2-positive cell lines**

461 UACC-893, HCC-202, MDA-MB-453, ZR-75-1, HCC-1419, HCC-2218, BT-474,  
462 MDA-MB-361, and UACC-812 cells were intravenously injected in the NOD-SCID mice  
463 (MDA-MB-453, n = 9; UACC-893, n = 7; HCC-202, n = 5; MDA-MB-361, n = 3; others, n =  
464 4). Lung metastasis was quantified by measuring bioluminescence every week, and the data



465 were plotted into a growth curve. Each cell line shows the corresponding mouse. Left:  
466 Bioluminescence on week 1. Right: Bioluminescence on week 8. (a) Cell lines in the low  
467 metastasis group. (b) Cell lines in the no metastasis group. (c) The lungs were removed from  
468 each mouse after the 8-week measurement, and luminescence from the lung was detected  
469 using *ex vivo* BLI.

470

#### 471 **Fig. 5 Extraction of lung metastasis gene signatures of the HER2-positive cell lines**

472 (a) Gene signatures associated with lung metastasis or survival in the low-metastasis group  
473 were extracted in the same method as that for gene signatures associated with bone metastasis.  
474 The numbers of upregulated and downregulated genes in the low or no metastasis group are  
475 shown as Venn diagrams. (b) Differential expression gene (DEGs) between the low and no  
476 metastasis groups according to microarray data were analyzed using hierarchical clustering as  
477 a heatmap. (c) A Gene Ontology enrichment analysis of the DEGs was performed for the low  
478 metastasis group.

479

#### 480 **Fig. 6 Clustering of metastatic activities in the HER2-positive cell lines**

481 An overview of the metastatic ability of the HER2-positive cell lines is shown. (a) The  
482 clustering of whole-gene expression was performed using the wardD2 method. The cell lines  
483 were clustered into three groups. (b) The 3-D principal component analysis (PCA) plot of  
484 nine HER2-positive breast cancer cell lines according to their metastatic potentials. The PCA  
485 was performed as shown in Supplementary Table S1.

486

#### 487 **Fig. 7 Breast cancer subtype-specific gene signatures in metastasis**

488 The numbers of upregulated and downregulated genes among the luminal, HER2-positive,  
489 and TNBC subtypes are summarized as Venn diagrams. The commonly upregulated or  
490 downregulated genes are listed in the table at the bottom.

491

#### 492 **Fig. 8 Organ-specific gene signatures in breast cancer metastasis**

493 The numbers of upregulated and downregulated genes in the bone, lung, and brain are  
494 summarized as Venn diagrams. The commonly upregulated or downregulated genes are listed

495 in the table at the bottom.

496

497

498 **Supplementary Figure Legends**

499

500 **Supplementary Fig. S1 Clinical prognosis of bone metastasis gene signatures in all the**  
501 **subtypes**

502 The survival analysis of the DEGs in the high potential group was performed using the  
503 METABRIC data set. The table at the bottom lists the number of patients with high or low  
504 gene expressions in all the breast cancer subtypes. (a) Survival analysis of the upregulated  
505 DEGs in all patients with breast cancer. (b) Survival analysis of the downregulated DEGs in  
506 all the patients with breast cancer.

507

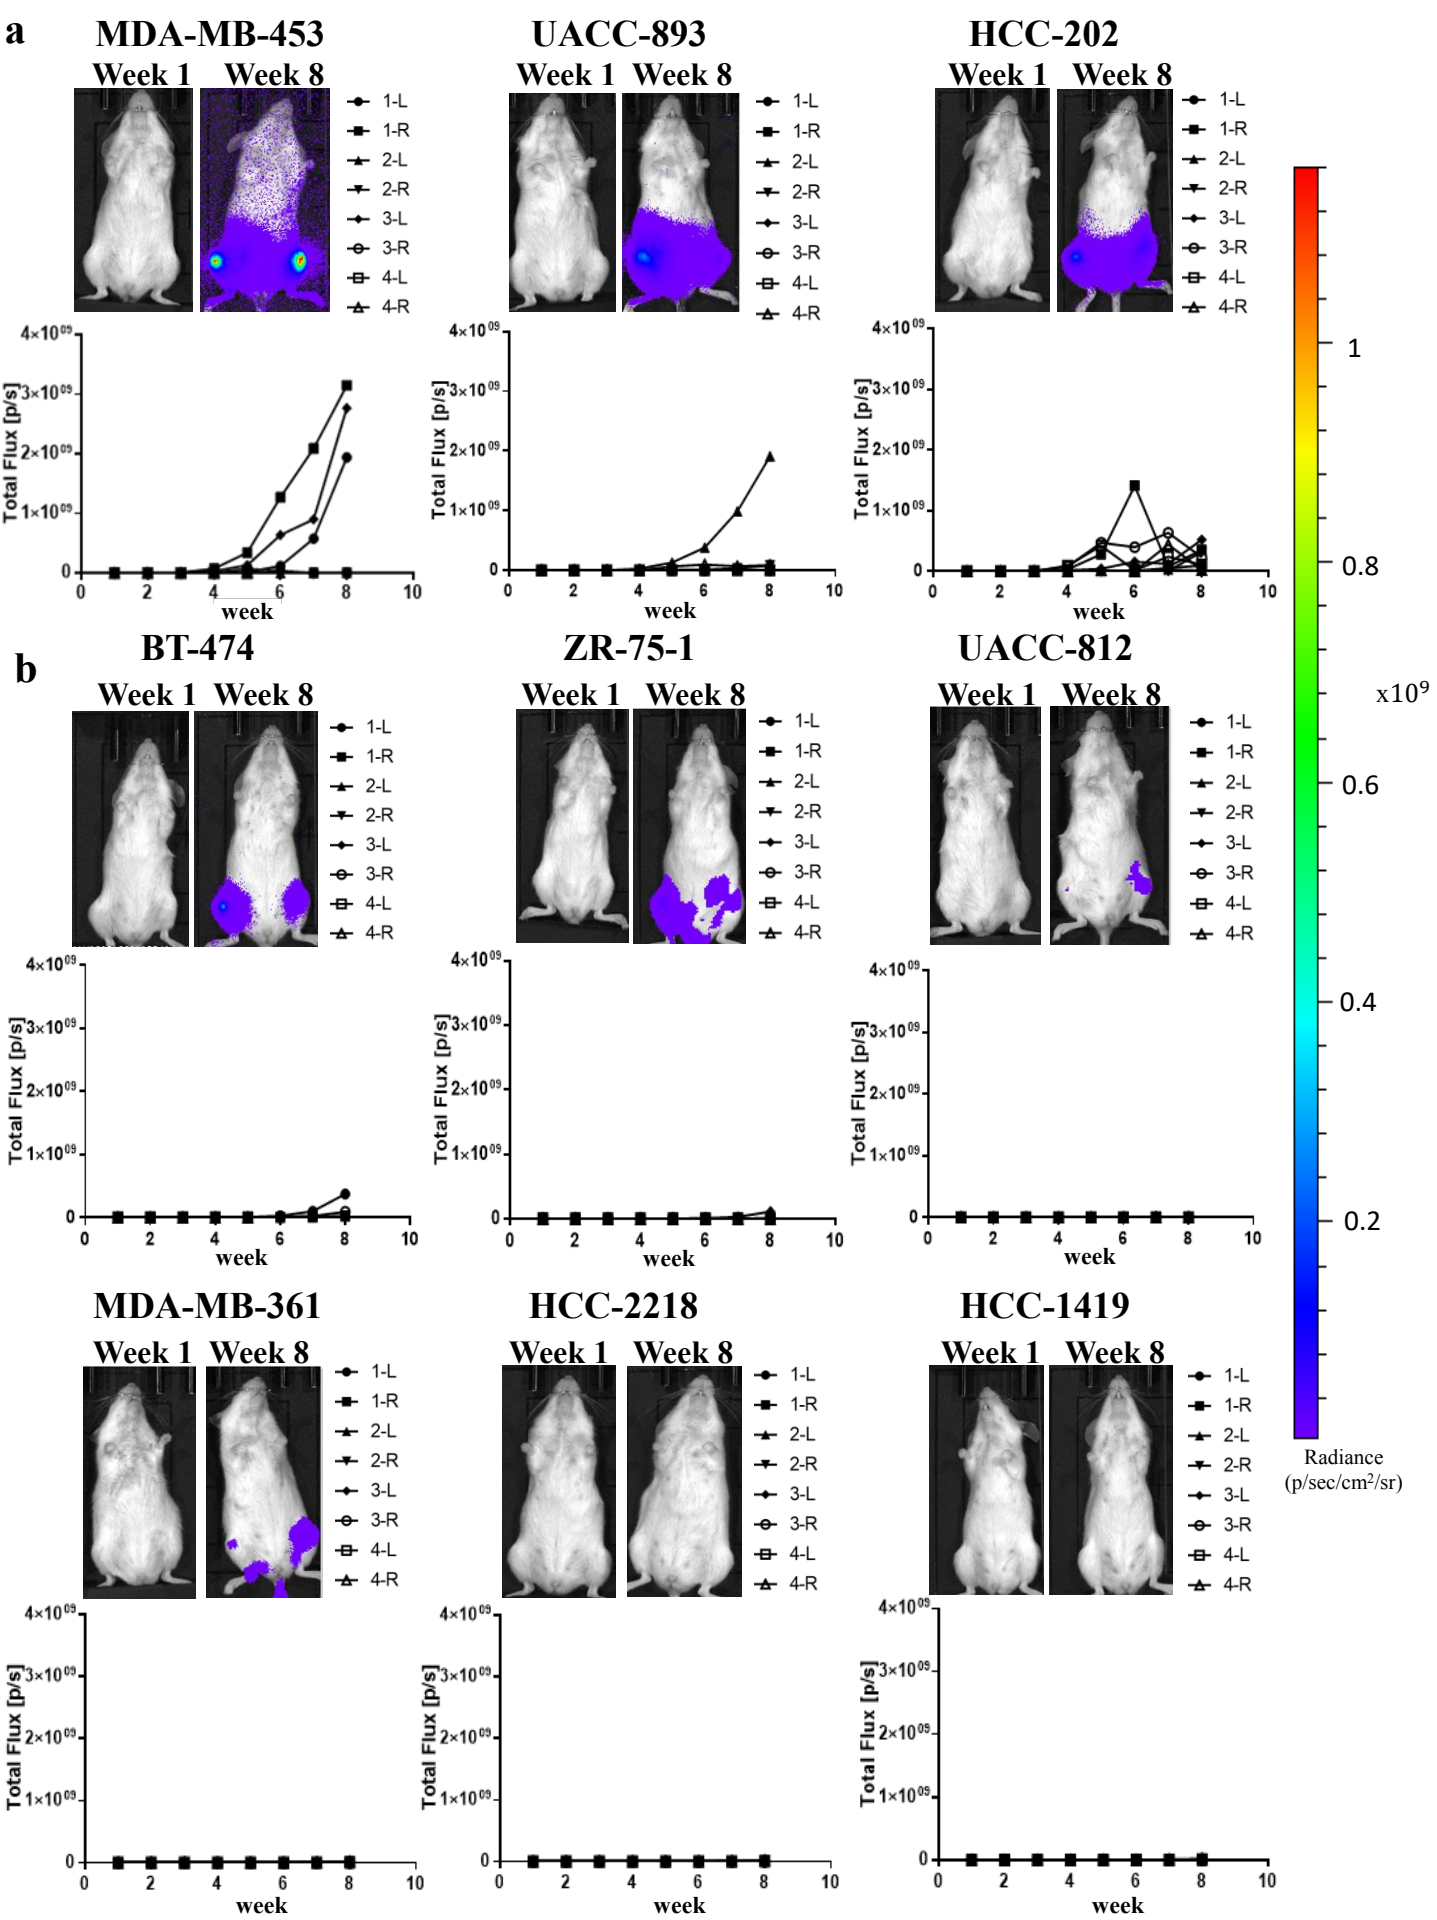

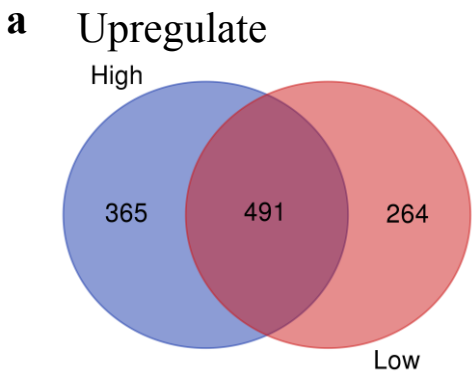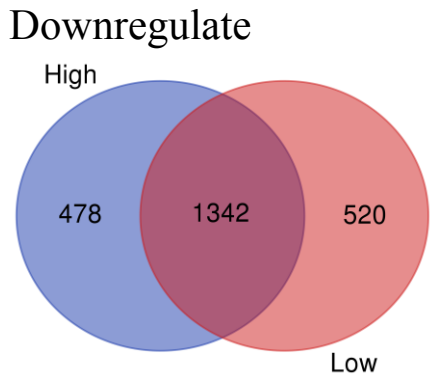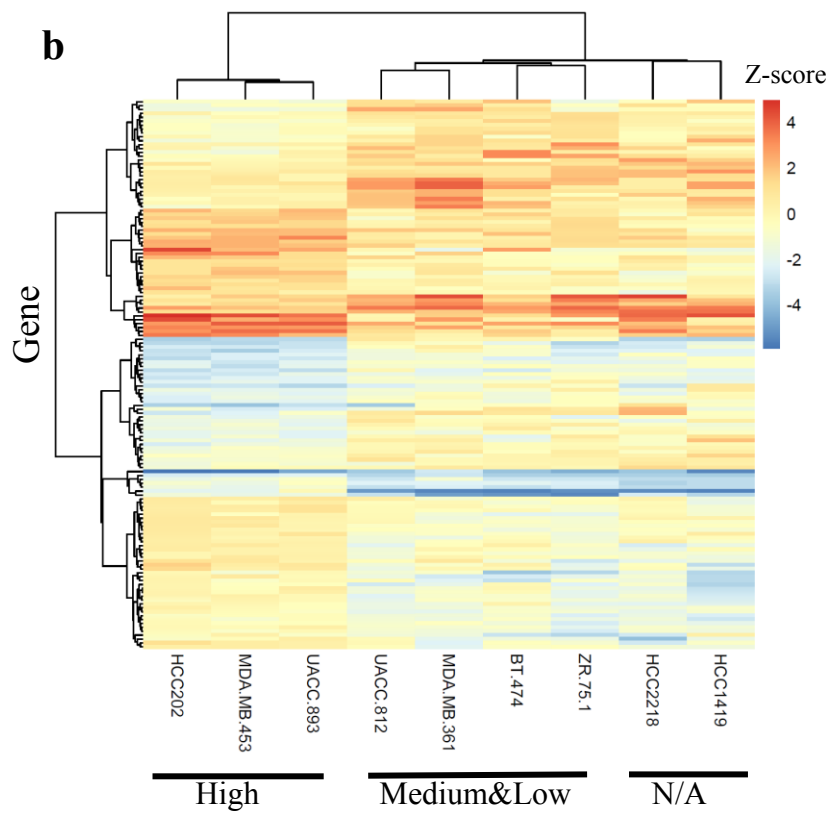

**c** Upregulate

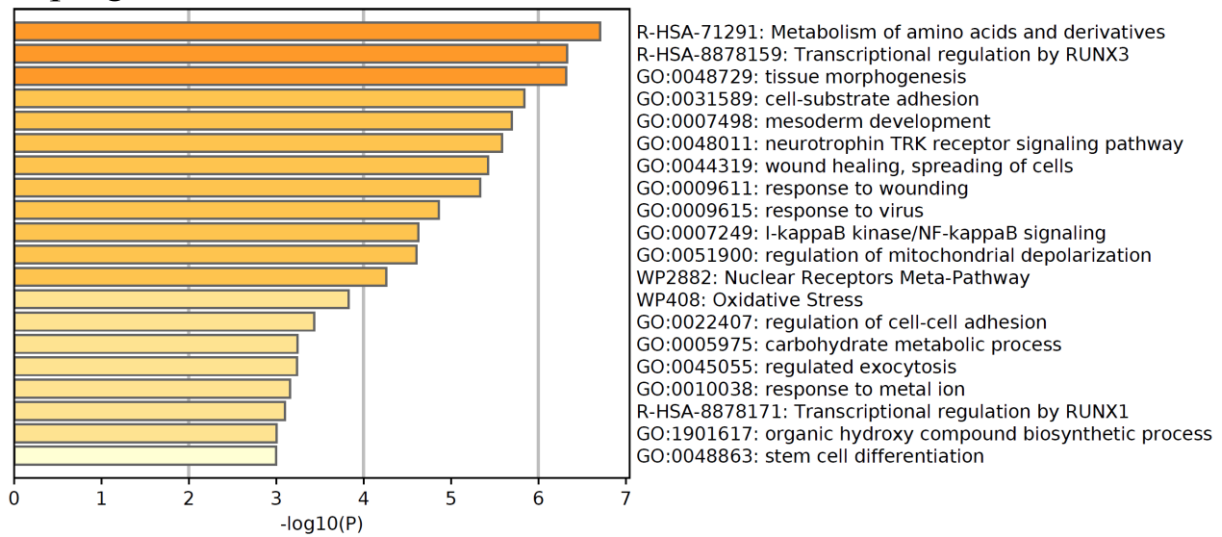

Downregulate

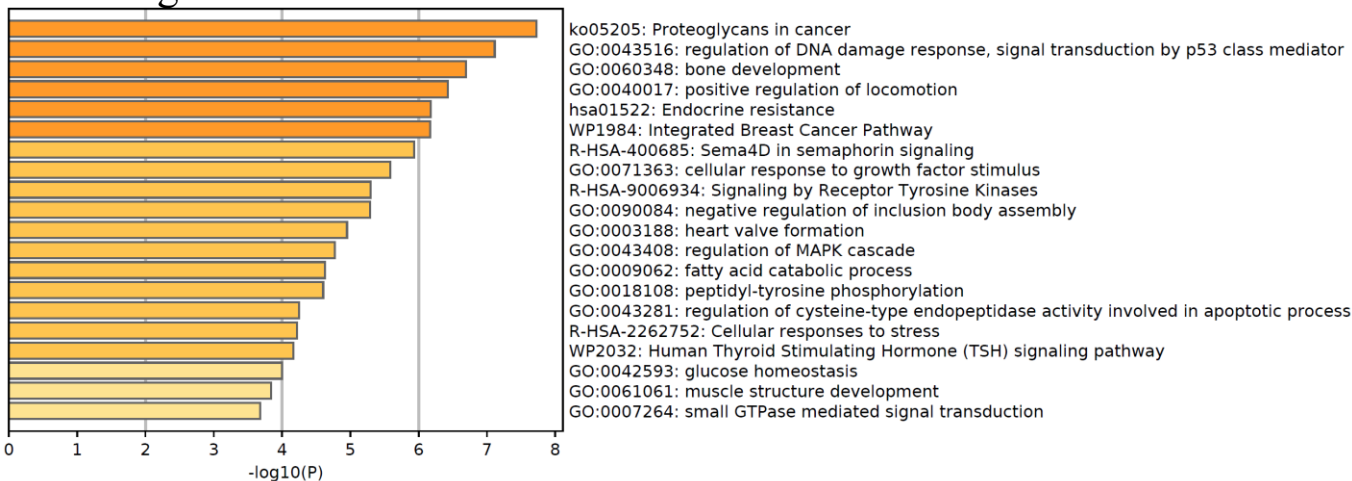

**a**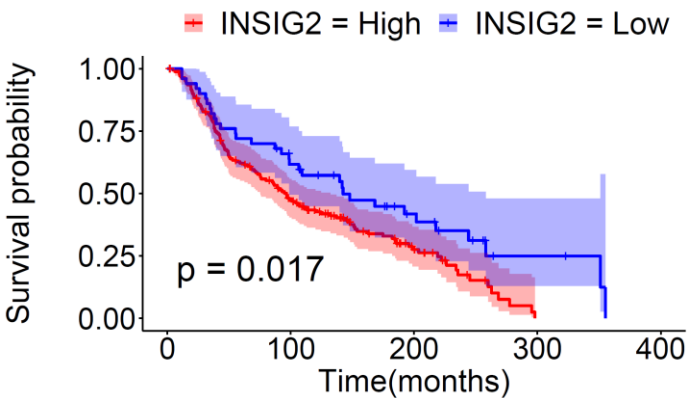

Number at risk

|               | 0   | 100 | 200 | 300 | 400 |
|---------------|-----|-----|-----|-----|-----|
| INSIG2 = High | 170 | 73  | 23  | 0   | 0   |
| INSIG2 = Low  | 50  | 29  | 13  | 3   | 0   |

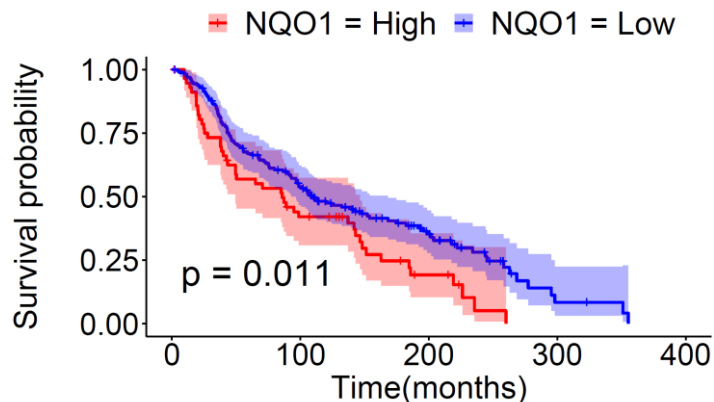

Number at risk

|             | 0   | 100 | 200 | 300 | 400 |
|-------------|-----|-----|-----|-----|-----|
| NQO1 = High | 57  | 22  | 6   | 0   | 0   |
| NQO1 = Low  | 163 | 80  | 30  | 3   | 0   |

**a**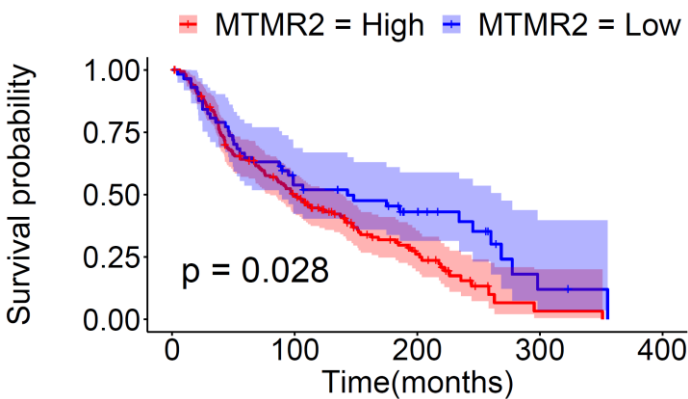

Number at risk

|              | 0   | 100 | 200 | 300 | 400 |
|--------------|-----|-----|-----|-----|-----|
| MTMR2 = High | 163 | 74  | 21  | 1   | 0   |
| MTMR2 = Low  | 57  | 28  | 15  | 2   | 0   |

**b**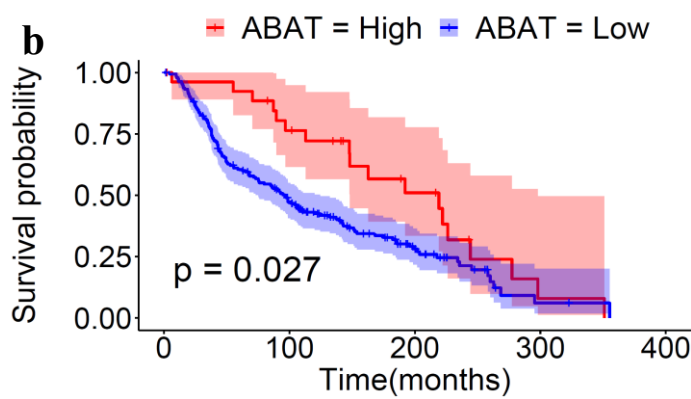

Number at risk

|             | 0   | 100 | 200 | 300 | 400 |
|-------------|-----|-----|-----|-----|-----|
| ABAT = High | 27  | 19  | 9   | 1   | 0   |
| ABAT = Low  | 193 | 83  | 27  | 2   | 0   |

Figure 4

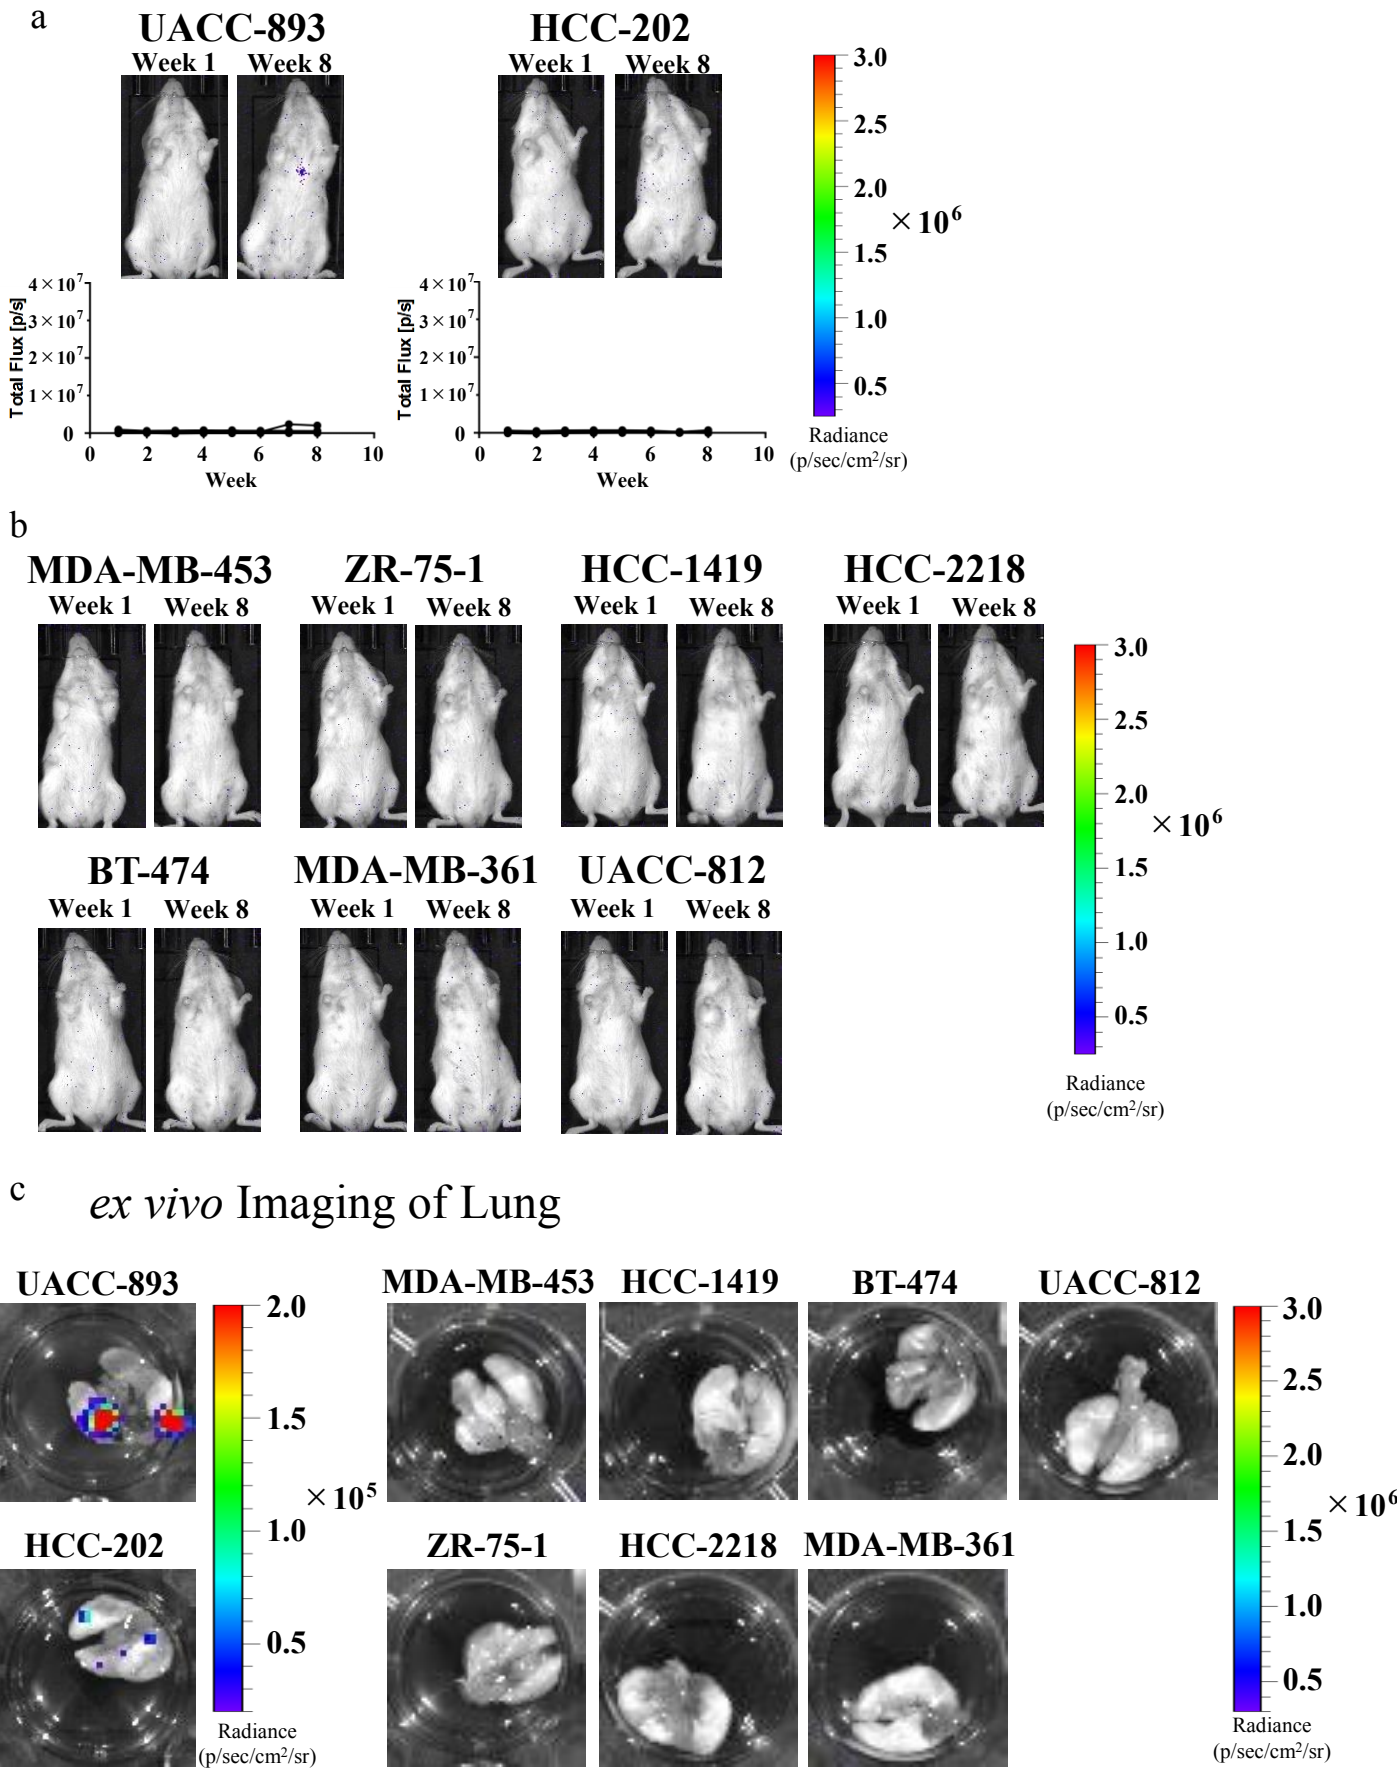



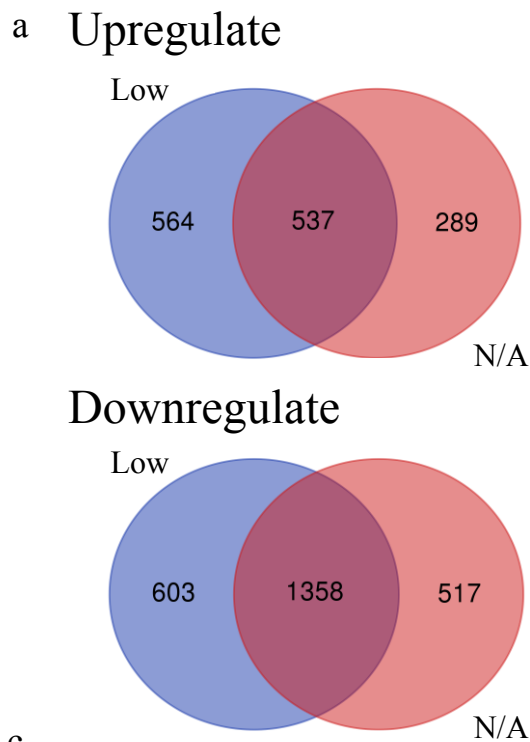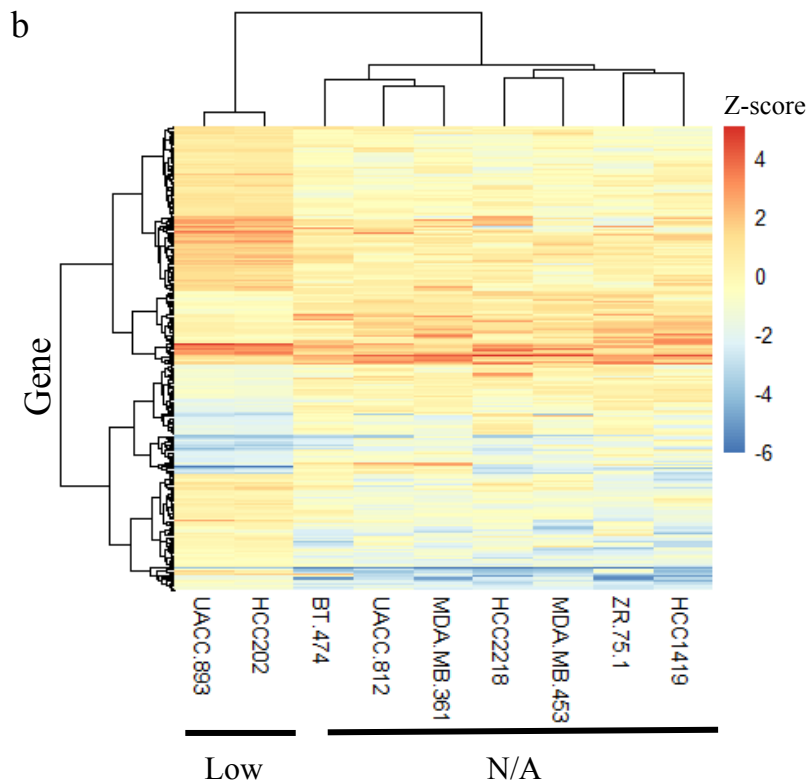

**c** Upregulate

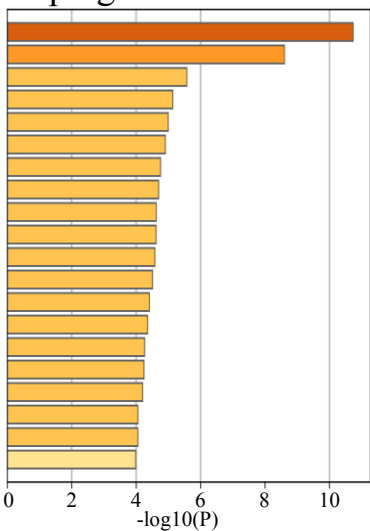

- R-HSA-556833: Metabolism of lipids
- WP2882: Nuclear receptors meta-pathway
- R-HSA-8978868: Fatty acid metabolism
- GO:0071417: cellular response to organonitrogen compound
- hsa04916: Melanogenesis
- R-HSA-382551: Transport of small molecules
- WP2873: Aryl hydrocarbon receptor pathway
- GO:0014075: response to amine
- GO:0030855: epithelial cell differentiation
- GO:0042493: response to drug
- R-HSA-3928665: EPH-ephrin mediated repulsion of cells
- R-HSA-8862803: Deregulated CDK5 triggers multiple neurodegenerative pathways in Alzheimer's disease models
- GO:0009611: response to wounding
- GO:0000578: embryonic axis specification
- GO:0006914: autophagy
- GO:0007420: brain development
- GO:1901615: organic hydroxy compound metabolic process
- GO:0006820: anion transport
- GO:0035235: ionotropic glutamate receptor signaling pathway
- GO:1903727: positive regulation of phospholipid metabolic process

Downregulate

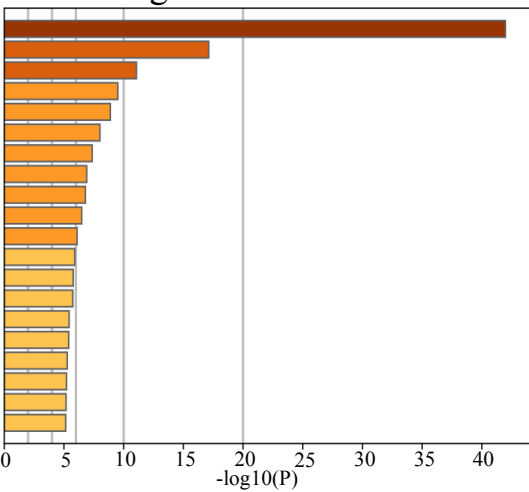

- R-HSA-156842: Eukaryotic Translation Elongation
- GO:1903047: mitotic cell cycle process
- R-HSA-1640170: Cell Cycle
- GO:0022613: ribonucleoprotein complex biogenesis
- GO:0044770: cell cycle phase transition
- R-HSA-109582: Hemostasis
- R-HSA-72203: Processing of Capped Intron-Containing Pre-mRNA
- GO:0007420: brain development
- ko03013: RNA transport
- GO:0051640: organelle localization
- GO:0008285: negative regulation of cell population proliferation
- GO:0000904: cell morphogenesis involved in differentiation
- GO:0046649: lymphocyte activation
- WP289: Myometrial relaxation and contraction pathways
- GO:1903320: regulation of protein modification by small protein conjugation or removal
- GO:0061351: neural precursor cell proliferation
- R-HSA-2980766: Nuclear Envelope Breakdown
- GO:0051129: negative regulation of cellular component organization
- GO:0033044: regulation of chromosome organization
- M14: PID AURORA B PATHWAY



**a**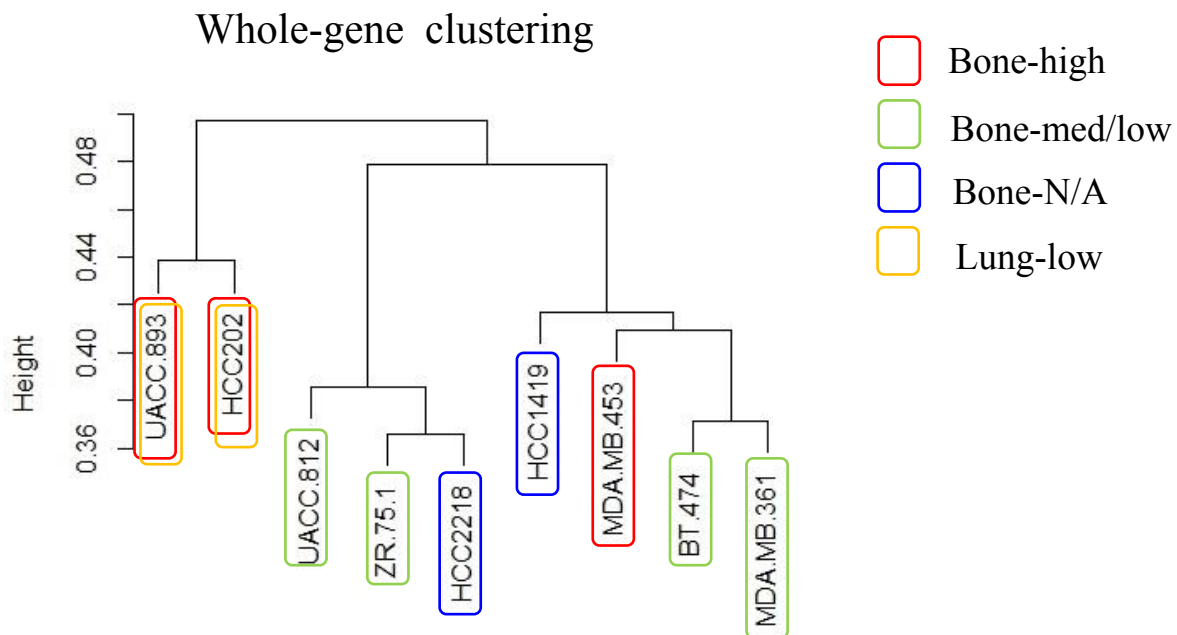**b**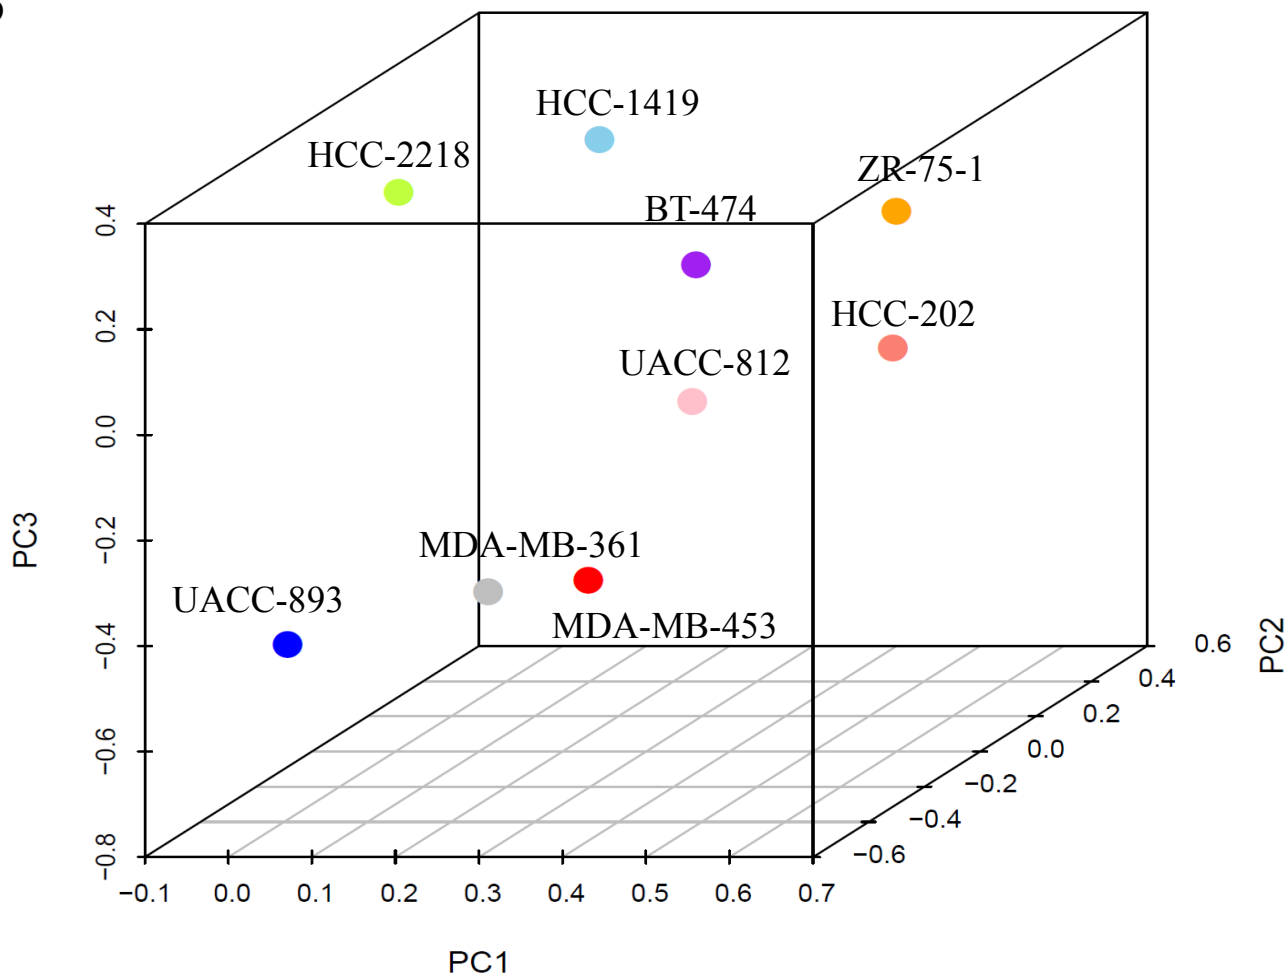

## Upregulate

HER2-positive

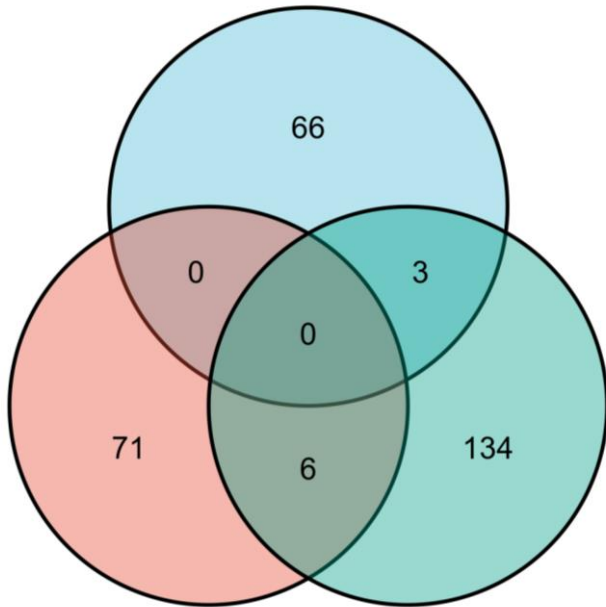

TNBC-BM

Luminal-BM

| HER2-positive AND<br>Luminal-BM NOT TNBC-<br>BM | TNBC-BM AND<br>Luminal-BM NOT HER2-<br>positive |
|-------------------------------------------------|-------------------------------------------------|
|-------------------------------------------------|-------------------------------------------------|

LGALS1

AGR2

FLNA

CYFIP2

ASPH

DUSP13

RORA

S100A4

SERPINF1

## Downregulate

HER2-positive

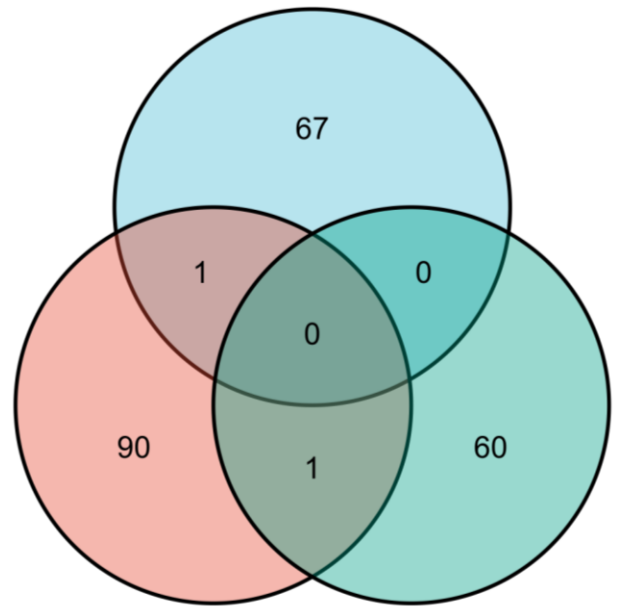

TNBC-BM

Luminal-BM

| HER2-positive AND<br>TNBC-BM NOT<br>Luminal-BM | TNBC-BM AND<br>Luminal-BM NOT<br>HER2-positive |
|------------------------------------------------|------------------------------------------------|
|------------------------------------------------|------------------------------------------------|

ADAMTS15

ADAMTS19

## Upregulate

Bone

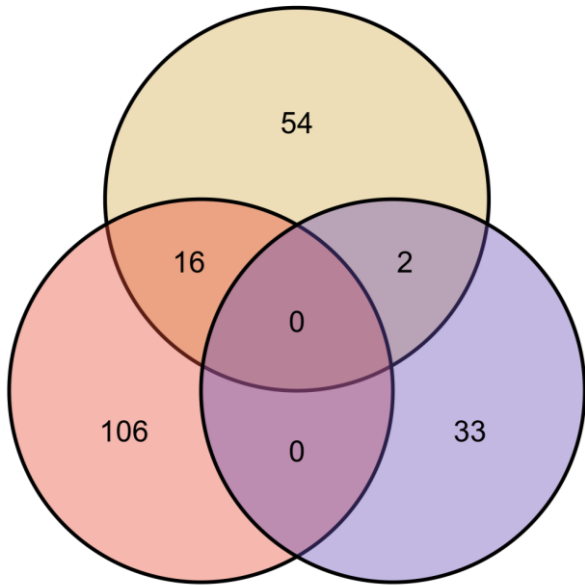

Lung

Brain

| Bone AND Lung NOT Brain | Bone AND Brain NOT Lung |
|-------------------------|-------------------------|
|-------------------------|-------------------------|

|              |        |
|--------------|--------|
| ALG8         | LGALS1 |
| SPRY1        | INHBB2 |
| ACPI         |        |
| DDIT4        |        |
| NQO1         |        |
| JUB          |        |
| TEAD2        |        |
| ODC1         |        |
| INSIG2       |        |
| MTMR2        |        |
| EXT1         |        |
| CKLF         |        |
| TXNRD1       |        |
| DKFZp762C186 |        |
| TACSTD2      |        |
| FLOT1        |        |

## Downregulate

Bone

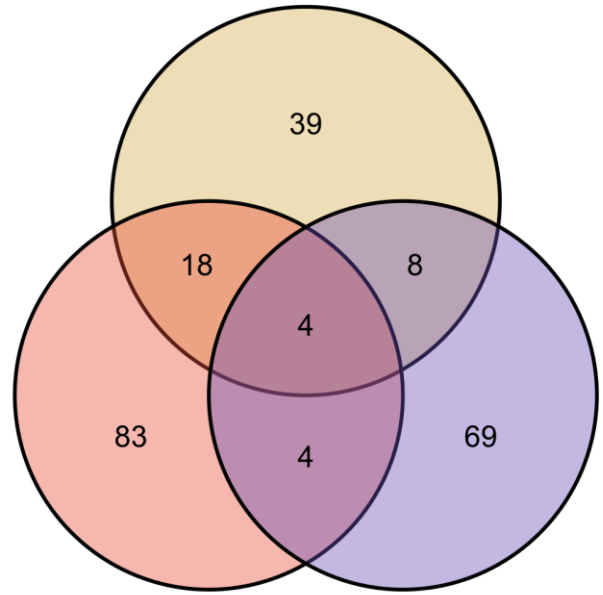

Lung

Brain

| Bone AND Lung NOT Brain | Bone AND Brain NOT Lung | Lung AND Brain NOT Bone | Bone AND Lung AND Brain |
|-------------------------|-------------------------|-------------------------|-------------------------|
|-------------------------|-------------------------|-------------------------|-------------------------|

|          |          |         |        |
|----------|----------|---------|--------|
| ZNF385   | FOXD1    | RBBP7   | MYBL1  |
| RPL9     | CTTNBP2  | ARSD    | ABAT   |
| GDF1     | KREMEN1  | PCSK1N  | TWIST1 |
| TGM2     | FLJ23749 | SCGB1D2 | OLFM1  |
| NAB1     | IGF1R    |         |        |
| LARGE    | TPBG     |         |        |
| RPL26    | ESR1     |         |        |
| SCAM1    | MGC4266  |         |        |
| ARHGDIG  |          |         |        |
| KCNG1    |          |         |        |
| PLP2     |          |         |        |
| TMEM16A  |          |         |        |
| ADAMTS15 |          |         |        |
| MPP6     |          |         |        |
| GNAS     |          |         |        |
| VIPR2    |          |         |        |
| PKIA     |          |         |        |
| FABP5    |          |         |        |

**Table 1. Metastasis profile of HER2-positive cell line**

| Cell line  | Bone metastatic tumor number / total leg number | Bone metastasis ability evaluation | Lung metastatic tumor number / total mouse number | Lung metastasis ability evaluation |
|------------|-------------------------------------------------|------------------------------------|---------------------------------------------------|------------------------------------|
| MDA-MB-453 | 3/8                                             | High                               | 0/9                                               | N/A                                |
| UACC893    | 4/8                                             | High                               | 1/7                                               | Low                                |
| HCC202     | 7/8                                             | High                               | 2/5                                               | Low                                |
| BT474      | 3/8                                             | Medium                             | 0/4                                               | N/A                                |
| ZR-75-1    | 4/8                                             | Medium                             | 0/4                                               | N/A                                |
| MDA-MB-361 | 5/8                                             | Low                                | 0/3                                               | N/A                                |
| UACC812    | 4/8                                             | Low                                | 0/4                                               | N/A                                |
| HCC1419    | 0/8                                             | N/A                                | 0/4                                               | N/A                                |
| HCC2218    | 0/8                                             | N/A                                | 0/4                                               | N/A                                |

| Gene_name    | Gene_ID       | LogFC    |
|--------------|---------------|----------|
| GAGED2       | NM_020411     | 3.981117 |
| SECTM1       | NM_003004     | 3.474067 |
| SLCO2A1      | NM_005630     | 2.83765  |
| LGALS1       | NM_002305     | 2.492867 |
| IQGAP2       | NM_006633     | 2.341167 |
| CALML5       | NM_017422     | 2.236683 |
| TEAD2        | NM_003598_(2) | 2.21825  |
| KMO          | NM_003679     | 1.987383 |
| G6PD         | NM_000402     | 1.987317 |
| INSIG2       | NM_016133     | 1.936917 |
| LOC51668     | NM_016126     | 1.924967 |
| INHBB        | NM_002193     | 1.869333 |
| ACN9         | NM_020186     | 1.85965  |
| CXorf6       | NM_005491     | 1.8036   |
| SQRDL        | NM_021199     | 1.774333 |
| TEAD2        | NM_003598     | 1.7451   |
| SYT12        | NM_177963     | 1.679267 |
| JUB          | NM_198086     | 1.679033 |
| COMMD3       | NM_012071     | 1.6636   |
| FLNA         | NM_001456     | 1.61915  |
| LGALS8       | NM_201545     | 1.602083 |
| PLEKHC1      | NM_006832     | 1.5816   |
| APOBEC3B     | NM_004900     | 1.573883 |
| JUB          | NM_032876     | 1.555883 |
| CYBRD1       | NM_024843     | 1.55275  |
| MEST         | NM_002402     | 1.544767 |
| DKFZp762C186 | XM_170658     | 1.517167 |
| NQO1         | NM_000903     | 1.5128   |
| ODC1         | NM_002539     | 1.50245  |
| CKLF         | NM_016951     | 1.464183 |

| Gene_name | Gene_ID       | LogFC  |
|-----------|---------------|--------|
| MAGEA2    | NM_175743     | 4.4271 |
| MAGEA9    | NM_005365     | 3.6886 |
| FADS2     | NM_004265     | 3.6285 |
| MESP1     | NM_018670     | 3.4448 |
| D2S448    | XM_056455     | 3.1991 |
| CDH3      | NM_001793     | 2.934  |
| TMPRSS2   | NM_005656     | 2.8641 |
| CRIM1     | NM_016441     | 2.7695 |
| PDE4B     | NM_002600     | 2.5558 |
| EDN1      | NM_001955     | 2.5277 |
| EFEMP1    | NM_004105     | 2.4872 |
| ABCC3     | NM_003786     | 2.4322 |
| PHYH      | NM_006214     | 2.3426 |
| FLJ22671  | NM_024861_(2) | 2.3006 |
| LGALS1    | NM_002305     | 2.2823 |
| TEAD2     | NM_003598_(2) | 2.1974 |
| MDS025    | NM_021825     | 2.1381 |
| TP53BP2   | NM_005426_(2) | 2.1045 |
| PPARBP    | NM_004774     | 2.0872 |
| KIAA0644  | AB014544      | 2.0859 |
| UBE2L6    | NM_004223     | 2.0311 |
| PCP4      | NM_006198     | 2.0165 |
| ACN9      | NM_020186     | 1.9784 |
| CAPN2     | NM_001748     | 1.9782 |
| AK5       | NM_012093     | 1.9767 |
| JUB       | NM_198086     | 1.8751 |
| ASS       | NM_000050     | 1.8692 |
| TENS1     | NM_022748     | 1.8676 |
| STAT5A    | NM_003152     | 1.8587 |
| IBRDC2    | NM_182757     | 1.856  |
